# Supplementary material for: Quantitative analysis of vertebral fat fraction in osteoporosis using IDEAL-IQ sequences
Source: Research Square preprint supplement (doi:10.21203/rs.3.rs-2863232/v1), 2023-05-02
Supplement: Supplementary file 1 [file 4d69a6cb2befb69b934c3239.pdf]

|                            | Control      | Osteopenia   | Osteoporosis | P value               |
|----------------------------|--------------|--------------|--------------|-----------------------|
| cases                      | 56           | 75           | 43           |                       |
| Age(years)                 | 48.61±10.80  | 52.09±11.49  | 63.79±9.02   | 0.000* <sup>bc</sup>  |
| Height(m)                  | 1.61±0.07    | 1.62±0.07    | 1.56±0.07    | 0.000* <sup>bc</sup>  |
| Weight(kg)                 | 65.28±11.46  | 65.47±10.72  | 58.27±8.19   | 0.001* <sup>bc</sup>  |
| BMI(kg/m <sup>2</sup> )    | 24.92±3.36   | 24.92±3.25   | 23.92±3.30   | 0.226                 |
| Visceral adiposity (g)     | 12.96±5.10   | 13.55±6.32   | 12.39±4.54   | 0.544                 |
| Subcutaneous adiposity (g) | 15.71±5.32   | 14.72±5.60   | 14.05±6.23   | 0.336                 |
| aBMD(g/cm <sup>2</sup> )   | 1.05±0.09    | 0.89±0.04    | 0.70±0.06    | 0.000* <sup>abc</sup> |
| FF(%)                      | 43.85±9.77   | 48.76±9.89   | 58.03±9.12   | 0.000* <sup>abc</sup> |
| R2*                        | 155.20±51.18 | 147.49±41.89 | 143.76±31.95 | 0.391                 |

**Table 2.** The age, height, weight, BMI, visceral adiposity, subcutaneous adiposity, aBMD, FF and R2\* values of the different groups according to DXA scan. P value < 0.05 means a significant difference. \* means there is a significant difference among three groups.<sup>a</sup> means there is a significant difference between control and osteopenia group.<sup>b</sup> means there is a significant difference between control and osteoporosis group.<sup>c</sup> means there is a significant difference between osteopenia and osteoporosis group.
